# Supplementary material
Source: publisher figshare collection journal article supplement (https://acs.figshare.com/ndownloader/files/5180530)
Supplement: Supplementary file 1 [file 5180530]

Supporting Information

**Construction of a C(30-38) Dioxabicyclo[3.2.1]octane Subtarget for  
(+)-Sorangicin A, Exploiting a Regio- and Stereocontrolled Acid-Catalyzed  
Epoxide Ring Opening**

Amos B. Smith, III,\* and Richard J. Fox

*Department of Chemistry, Laboratory for Research on the Structure of Matter, and Monell Chemical  
Senses Center, University of Pennsylvania, Philadelphia, PA 19104, U.S.A.*

## 1. Materials and Methods

Except as otherwise indicated, all reactions were carried out under an argon atmosphere in flame- or oven-dried glassware, and solvents were freshly distilled. The argon was deoxygenated and dried by passage through an OXICLEAR™ filter from Aldrich and Drierite tube, respectively. Diethyl ether (Et<sub>2</sub>O) and tetrahydrofuran (THF) were distilled from sodium/benzophenone. Dichloromethane (CH<sub>2</sub>Cl<sub>2</sub>) was distilled from calcium hydride. *n*-Butyllithium (*n*-BuLi) and methyllithium (MeLi) were purchased from Aldrich and titrated against *n*-benzylbenzamide prior to use.<sup>1</sup> Boron trifluoride etherate (BF<sub>3</sub>•OEt<sub>2</sub>) was purchased from Aldrich and distilled over calcium hydride prior to use. 1,2:4,5-Di-*O*-isopropylidene- $\alpha$ -D-*erythro*-2,3-hexodiulo-2,6-pyranose<sup>2</sup> was purchased from Aldrich and recrystallized prior to use. All other reagents were purchased from Aldrich, Acros or Strem Chemicals and used as received.

Reactions were monitored by thin layer chromatography (TLC) with 0.25-mm E. Merck pre-coated silica gel plates. Silica gel for flash chromatography (particle size 0.040-0.063 mm) was supplied by Bodman, Silicycle and Sorbent Technologies. Yields refer to chromatographically and spectroscopically pure compounds unless otherwise noted.

All melting points were determined on a Thomas-Hoover apparatus and are uncorrected. <sup>1</sup>H and <sup>13</sup>C spectra were recorded on a Bruker AMX-500 spectrometer. Chemical shifts are reported as  $\delta$  values relative to internal chloroform ( $\delta$  7.26) or benzene ( $\delta$  7.15) for <sup>1</sup>H and either chloroform ( $\delta$  77.0) or benzene ( $\delta$  128.0) for <sup>13</sup>C. Infrared spectra were recorded on either a Perkin-Elmer model 283B, Perkin-Elmer model 1600 FTIR, or Jasco FTIR-480plus spectrometer. Optical rotations were measured on a Perkin-Elmer model 241 polarimeter in the solvent indicated. High resolution mass spectra were measured at the University of Pennsylvania Mass Spectrometry Center by Dr. Rakesh Kohli or Mr. John Dykins on either a VG Micromass 70/70H or VG ZAB-E spectrometer. Single crystal X-ray structures were determined by Dr. Patrick Carroll at the University of Pennsylvania with an Enraf Nonius CAD-4 automated diffractometer.

## 2. Experimental Procedures

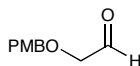

**5**

**Aldehyde 5.** The NaH (5.59 g, 2.3 equiv., 60% wt.) was first washed with HPLC grade hexanes (3 x 30 mL) and dried *in vacuo*. Anhydrous DMF (90 mL) was then added and the white suspension was carefully treated with a solution of distilled *cis*-2-butene-1,4-diol (5.32 g, 60.4 mmole) in DMF (35 mL). Gas evolution! The pale brown solution was then warmed to 60 °C, and after 2 h, treated with tetrabutylammonium iodide (1.11 g, 0.05 equiv.) and *p*-methoxybenzyl chloride (18.8 mL, 2.3 equiv.). Exotherm! After 2.5 h, the reaction was cooled to ambient temperature and diluted with ether (150 mL) and water (150 mL). The aqueous phase was then washed with ether (3 x 100 mL) and the combined organic layers were washed with water (2 x 50 mL), brine (50 mL), dried over MgSO<sub>4</sub> and concentrated *in vacuo*. Purification by flash chromatography (6/1, hexanes/EtOAc) gave 18.70 g (94% yield) of the bis-PMB compound as a colorless oil: *R*<sub>f</sub> 0.13 (6/1, hexanes/EtOAc); IR (thin film, CDCl<sub>3</sub>) 3000 (w), 2934 (w), 2836 (m), 1612 (s), 1586 (m), 1513 (s), 1464 (m), 1302 (m), 1248 (s), 1173 (m), 1081 (s), 1035 (s) cm<sup>-1</sup>; <sup>1</sup>H NMR (500 MHz, CDCl<sub>3</sub>)  $\delta$  7.25 (d, *J* = 8.7 Hz, 4 H), 6.87 (d, *J* = 8.7 Hz, 4 H), 5.77 (m, 2 H), 4.42 (s, 4 H), 4.04 (d, *J* = 3.7 Hz, 4 H), 3.80 (s, 6 H); <sup>13</sup>C NMR (125 MHz, CDCl<sub>3</sub>)  $\delta$  159.24, 130.27, 129.50, 129.34, 113.80, 71.86, 65.46, 55.24; high resolution mass spectrum (ES+) *m/z* 351.1571 [(M+Na)<sup>+</sup>; calcd for C<sub>20</sub>H<sub>24</sub>O<sub>4</sub>Na<sup>+</sup>: 351.1580].

A solution of the above olefin (7.07 g, 21.5 mmole) and a catalytic amount of Sudan III in HPLC grade CH<sub>2</sub>Cl<sub>2</sub> (215 mL) was cooled to -78 °C and a stream of ozone was bubbled through the orangish/pink solution for 25 min. until a yellowish/brown color persisted. After purging the reaction with oxygen, a solution of triphenylphosphine (8.48 g, 1.5 equiv.) in CH<sub>2</sub>Cl<sub>2</sub> (60 mL) was added dropwise over 15 min. and the solution was allowed to slowly warm to ambient temperature. After 5.5 h, the orange solution was concentrated *in vacuo* and purified *via* bulb to bulb distillation to afford 4.10 g (53% yield) of aldehyde **5** as an orange oil, bp ~135 °C (~5 mmHg): IR (thin film, CDCl<sub>3</sub>) 3002 (w), 2837 (m), 2710 (w), 1733 (s), 1612 (s), 1586 (m), 1515 (s), 1465 (m), 1303 (m), 1249 (s), 1175 (m), 1109 (m), 1033 (s) cm<sup>-1</sup>; <sup>1</sup>H NMR (500 MHz, CDCl<sub>3</sub>)  $\delta$  9.70 (s, 1 H), 7.28 (d, *J* = 8.6 Hz, 2 H), 6.89 (d, *J* = 8.6 Hz, 2 H), 4.56 (s, 2 H),

4.05 (s, 2 H), 3.80 (s, 3 H);  $^{13}\text{C}$  NMR (125 MHz,  $\text{CDCl}_3$ )  $\delta$  200.56, 159.65, 129.70, 128.89, 113.98, 75.00, 73.32, 55.25; high resolution mass spectrum (CI,  $\text{NH}_3$ )  $m/z$  180.0786 [ $\text{M}^+$ ; calcd for  $\text{C}_{10}\text{H}_{12}\text{O}_3$ : 180.0782].

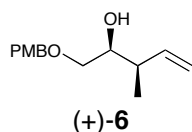

**Alcohol (+)-6.** The potassium *tert*-butoxide (~5.5 g) was heated at 100 °C under high vac overnight to dry. Some of this solid was then removed, and the flask containing the remaining KO<sup>t</sup>Bu (4.23 g, 1.5 equiv.) was equipped with a mechanical stir bar, charged with THF (16 mL) and cooled to –45 °C. *cis*-2-butene (3.7 mL, 1.6 equiv.) was then added *via* cannula, followed by *n*-BuLi (15.1 mL, 2.5 M in hexanes, 1.5 equiv.) dropwise over 20 min. to produce an orange suspension. After an additional 5 min., the reaction was cooled to –78 °C and treated with 44 mL (13.50 g, 1.7 equiv.) of a solution of (–)-methoxydiisocampheylborane (22.56 g, weighed out using a glove-bag) in THF (50 mL) dropwise over 15 min. After an additional 30 min., the colorless slurry was treated with  $\text{BF}_3 \cdot \text{OEt}_2$  (6.4 mL, 2.0 equiv.) dropwise over 10 min., the azeotroped aldehyde **5** (4.52 g, 25.1 mmole) *via* syringe pump over 1.5 h and 2 x 5 mL THF rinses. After an additional 3 h, the pale yellow slurry was charged with 3N NaOH (45 mL) and allowed to slowly warm to ambient temperature. During this period,  $\text{H}_2\text{O}_2$  (30% aq., 14 mL) was added in 1.5 mL portions to control bubbling and then brought to reflux for 1 h. The biphasic solution was then cooled to ambient temperature, and after 12 h, diluted with water (50 mL). The aqueous phase was then washed with ether (3 x 50 mL) and the combined organic layers were washed with brine (50 mL), dried over  $\text{MgSO}_4$  and concentrated *in vacuo*. Removal of the IPC-OH by distillation (bp ~60 °C, 0.15 mmHg) left 6.23 g of a residue which was purified by flash chromatography (4/1,  $\text{CH}_2\text{Cl}_2$ /ether) to afford 4.94 g (84% yield) of alcohol (+)-**6** as a pale yellow oil:  $R_f$  0.60 (4/1  $\text{CH}_2\text{Cl}_2$ /ether);  $[\alpha]_D^{20} +18.2$  ( $c$  0.63,  $\text{C}_6\text{H}_6$ ); IR (thin film,  $\text{CDCl}_3$ ) 3457 (m, br), 3075 (w), 2959 (m), 2907 (m), 2865 (m), 2836 (m), 1639 (w), 1612 (m), 1586 (w), 1513 (s), 1462 (m), 1302 (m), 1248 (s), 1173 (m), 1098 (m), 1035 (s)  $\text{cm}^{-1}$ ;  $^1\text{H}$  NMR (500 MHz,  $\text{CDCl}_3$ )  $\delta$  7.25 (d,  $J$  = 8.5 Hz, 2 H), 6.88 (d,  $J$  = 8.5 Hz, 2 H), 5.73 (ddd,  $J$  = 7.9, 10.3, 17.5 Hz, 1 H), 5.03 (m, 2 H), 4.47 (s, 2 H), 3.80 (s, 3 H), 3.62 (m, 1 H), 3.53 (dd,  $J$  = 3.1, 9.5 Hz, 1 H), 3.36 (dd,  $J$  = 7.8, 9.5 Hz, 1 H), 2.33 (m, 1 H), 1.07 (d,  $J$  = 6.8 Hz, 3 H);  $^{13}\text{C}$  NMR (125 MHz,  $\text{CDCl}_3$ )  $\delta$  159.21, 140.32,

130.04, 129.30, 114.97, 113.76, 73.33, 72.94, 72.39, 55.19, 41.03, 15.58; high resolution mass spectrum (Cl, NH<sub>3</sub>) m/z 236.1413 [M<sup>+</sup>; calcd for C<sub>14</sub>H<sub>20</sub>O<sub>3</sub>: 236.1412].

**Determination of Absolute Stereochemistry of (+)-6.** (*R*)-(-)- $\alpha$ -methoxy- $\alpha$ -trifluoromethyl-phenylacetyl chloride [(*R*)-MTPACl, 16  $\mu$ L, 2.0 equiv.) was added to a solution of (+)-**6** (10.0 mg, 42.3  $\mu$ mole) and 4-(*N,N*-dimethylamino)pyridine (20.6 mg, 4.0 equiv.) in CH<sub>2</sub>Cl<sub>2</sub> (500  $\mu$ L). After 3 h, direct purification by Preparative-TLC (5/1, hexanes/EtOAc, 500  $\mu$ m plate) afforded 18.0 mg (94% yield, >20:1 ratio of diastereomers) of the (*S*)-MTPA ester of (+)-**6** as a colorless oil: R<sub>f</sub> 0.42 (5/1, hexanes/EtOAc); [ $\alpha$ ]<sub>D</sub><sup>20</sup> -4.5 (c 0.71, C<sub>6</sub>H<sub>6</sub>); IR (thin film, CDCl<sub>3</sub>) 3071 (w), 2953 (m), 2851 (w), 1749 (s), 1613 (m), 1514 (s), 1452 (m), 1249 (s), 1172 (s), 1123 (m), 1022 (m) cm<sup>-1</sup>; <sup>1</sup>H NMR (500 MHz, CDCl<sub>3</sub>, \* represents the minor diastereomer)  $\delta$  7.60 (d, *J* = 7.8 Hz, 2 H), 7.35 (m, 1 H), 7.29 (m, 2 H), 7.21 (d, *J* = 8.6 Hz, 2 H), 6.86 (d, *J* = 8.6 Hz, 2 H), 5.66 (ddd, *J* = 7.6, 10.0, 17.5 Hz, 1 H), 5.26 (ddd, *J* = 3.2, 7.1, 7.1 Hz, 1 H), 5.15 (m, 2 H), 4.48 (d, *J* = 11.4 Hz, 1 H), 4.41 (d, *J* = 11.4 Hz, 1 H), 3.80 (s, 3 H), 3.63 (dd, *J* = 3.2, 10.9 Hz, 1 H), 3.59 (dd, *J* = 7.1, 10.9 Hz, 1 H), 3.56 (s, 3 H), 2.55 (m, 1 H), \*1.05 (d, *J* = 6.9 Hz, 3 H), 0.95 (d, *J* = 6.8 Hz, 3 H); <sup>13</sup>C NMR (125 MHz, CDCl<sub>3</sub>)  $\delta$  166.26, 159.28, 138.65, 132.56, 129.86, 129.42, 129.21, 128.20, 127.51, 124.59, 122.30, 116.04, 113.80, 77.85, 72.74, 69.36, 55.45, 55.27, 38.80, 15.13; high resolution mass spectrum (ES+) m/z 475.1728 [(M+Na)<sup>+</sup>; calcd for C<sub>24</sub>H<sub>27</sub>F<sub>3</sub>O<sub>5</sub>Na: 475.1811].

In similar fashion, the (*R*)-MTPA ester of (+)-**6** was obtained in 94% yield (>20:1 mixture of diastereomers) as a colorless oil: R<sub>f</sub> 0.42 (5/1, hexanes/EtOAc); [ $\alpha$ ]<sub>D</sub><sup>20</sup> +36.6 (c 0.85, C<sub>6</sub>H<sub>6</sub>); IR (thin film, CDCl<sub>3</sub>) 3070 (w), 2952 (m), 2867 (w), 1747 (s), 1613 (m), 1513 (s), 1452 (m), 1250 (s), 1171 (s), 1121 (m), 1019 (m) cm<sup>-1</sup>; <sup>1</sup>H NMR (500 MHz, CDCl<sub>3</sub>, \* represents the minor diastereomer)  $\delta$  7.56 (d, *J* = 7.6 Hz, 2 H), 7.39-7.31 (m, 3 H), 7.16 (d, *J* = 8.6 Hz, 2 H), 6.84 (d, *J* = 8.6 Hz, 2 H), 5.76 (ddd, *J* = 7.2, 10.4, 17.4 Hz, 1 H), 5.29 (ddd, *J* = 3.7, 6.8, 6.8 Hz, 1 H), 5.09 (m, 2 H), 4.39 (d, *J* = 11.5 Hz, 1 H), 4.34 (d, *J* = 11.5 Hz, 1 H), 3.80 (s, 3 H), 3.56 (dd, *J* = 3.7, 10.8 Hz, 1 H), 3.52 (dd, *J* = 6.8, 10.8 Hz, 1 H), 3.49 (s, 3 H), 2.62 (m, 1 H), 1.06 (d, *J* = 6.9 Hz, 3 H), \*0.95 (d, *J* = 6.9 Hz, 3 H); <sup>13</sup>C NMR (125 MHz, CDCl<sub>3</sub>)  $\delta$  166.26, 159.23, 138.95, 132.16, 129.94, 129.46, 129.17, 128.22, 127.81, 124.52, 122.23, 116.02, 113.75, 77.97, 72.77, 69.23, 55.44, 55.26, 38.55, 14.90; high resolution mass spectrum (ES+) m/z 475.1712 [(M+Na)<sup>+</sup>; calcd for

C<sub>24</sub>H<sub>27</sub>F<sub>3</sub>O<sub>5</sub>: 475.1811].

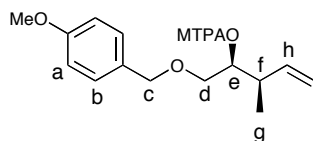

| Proton | ( <i>S</i> )-MTPA ester | ( <i>R</i> )-MTPA ester | ( <i>S</i> )-( <i>R</i> ) |
|--------|-------------------------|-------------------------|---------------------------|
| a      | 7.21                    | 7.16                    | +0.05                     |
| b      | 6.86                    | 6.84                    | +0.02                     |
| c1/c2  | 4.48/4.41               | 4.39/4.34               | +0.09/+0.07               |
| d1/d2  | 3.63/3.59               | 3.56/3.52               | +0.07/+0.07               |
| e      | 5.26                    | 5.29                    | -0.03                     |
| f      | 2.55                    | 2.62                    | -0.07                     |
| g      | 0.95                    | 1.06                    | -0.11                     |
| h      | 5.66                    | 5.76                    | -0.10                     |

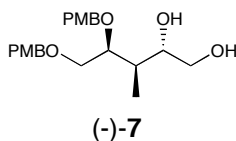

**Diol (-)-7.** A suspension of NaH (723 mg, 1.5 equiv., 95% wt.) and tetrabutylammonium iodide (cat.) in anhydrous DMF (230 mL) was cooled to 0 °C, and treated with a solution of azeotroped alcohol (+)-6 (4.50 g, 19.0 mmole) in DMF (20 mL) *via* cannula. After 1 h, the orangish slurry was charged with *p*-methoxybenzyl chloride (3.9 mL, 1.5 equiv.), and the reaction was allowed to warm to ambient temperature. After 14 h, the reaction mixture was diluted with water (200 mL) and 1:1 hexanes:EtOAc (200 mL). The aqueous phase was then washed with 1:1 hexanes:EtOAc (3 x 100 mL) and the combined organic layers were washed with brine (100 mL), dried over MgSO<sub>4</sub> and concentrated *in vacuo*. Purification by flash chromatography (10/1, hexanes/EtOAc) afforded 6.59 g (97% yield) of the bis-PMB compound as a pale yellow oil: *R*<sub>f</sub> 0.18 (10/1 hexanes/EtOAc); [ $\alpha$ ]<sub>D</sub><sup>20</sup> +6.1 (*c* 0.98, CH<sub>2</sub>Cl<sub>2</sub>); IR (thin film, CDCl<sub>3</sub>) 2933 (w), 2904 (w), 2862 (w), 2835 (w), 1612 (m), 1513 (s), 1464 (w), 1301 (m), 1247 (s), 1172 (m), 1088 (m), 1035 (s) cm<sup>-1</sup>; <sup>1</sup>H NMR (500 MHz, CDCl<sub>3</sub>)  $\delta$  7.27 (d, *J* = 8.7 Hz, 2 H), 7.26 (d, *J* = 8.7 Hz, 2 H), 6.88 (d, *J* = 8.7 Hz, 2 H), 6.86 (d, *J* = 8.7 Hz, 2 H), 5.81 (ddd, *J* = 7.6, 10.3, 17.6 Hz, 1 H), 5.04 (m, 1 H), 4.99 (m, 1 H), 4.65 (d, *J* = 11.2 Hz, 1 H), 4.51 (d, *J* = 11.2 Hz, 1 H), 4.46 (s, 2 H), 3.81 (s, 3 H), 3.80 (s, 3 H), 3.58 (dd, *J* = 3.7, 10.2 Hz, 1 H), 3.50 (dd, *J* = 6.1, 10.2 Hz, 1 H), 3.44 (ddd, *J* = 3.7, 6.1, 6.1 Hz, 1 H), 2.48 (m, 1 H), 1.05 (d, *J* = 6.8 Hz, 3 H); <sup>13</sup>C NMR (125 MHz, CDCl<sub>3</sub>)  $\delta$  159.07, 159.00, 141.01, 131.07, 130.54, 129.31, 129.15, 114.39, 113.68, 113.60, 81.43, 72.91, 72.35, 71.20, 55.22, 39.94, 15.51; high resolution mass spectrum (ES+) *m/z* 379.1875 [(*M*+Na)<sup>+</sup>; calcd for C<sub>22</sub>H<sub>28</sub>O<sub>4</sub>Na: 379.1988].

A mechanically stirred suspension of  $\text{K}_3\text{Fe}(\text{CN})_6$  (18.23 g, 3.0 equiv.),  $\text{K}_2\text{CO}_3$  (7.65 g, 3.0 equiv.) and  $(\text{DHQ})_2\text{-PYR}$  (325 mg, 0.02 equiv.) in 1:1  $t\text{BuOH}:\text{H}_2\text{O}$  (150 mL) was cooled to 0 °C and treated with  $\text{OsO}_4$  (1.1 mL, 0.01 equiv., 4% wt. in  $\text{H}_2\text{O}$ ) dropwise. After a few minutes, the above bis-PMB compound (6.58 g, 18.46 mmole) was added dropwise followed by 1:1  $t\text{BuOH}:\text{H}_2\text{O}$  rinses (3 x 12 mL). After 14 h, the orange suspension was *carefully* quenched by the portionwise addition of  $\text{NaHSO}_3$  (31 g). Gas evolution! The brown suspension was then diluted with water (250 mL), EtOAc (250 mL) and the aqueous phase was washed with EtOAc (3 x 100 mL). The combined organic layers were then washed with brine (50 mL), dried over  $\text{MgSO}_4$  and concentrated *in vacuo* to afford an ~10:1 mixture of diastereomers. Purification by flash chromatography (1/2, hexanes/EtOAc) afforded 5.95 g (83% yield) of diol (-)-**7** as a pale yellow, viscous oil:  $R_f$  0.32 (1/2 hexanes/EtOAc);  $[\alpha]_D^{20}$  -14.1 ( $c$  1.52,  $\text{CHCl}_3$ ); IR (thin film,  $\text{CDCl}_3$ ) 3418 (m, br), 2933 (m), 2836 (m), 1612 (m), 1514 (s), 1463 (m), 1302 (m), 1248 (s), 1173 (m), 1074 (m), 1034 (s)  $\text{cm}^{-1}$ ;  $^1\text{H}$  NMR (500 MHz,  $\text{CDCl}_3$ )  $\delta$  7.26 (d,  $J$  = 8.5 Hz, 2 H), 7.25 (d,  $J$  = 8.5 Hz, 2 H), 6.88 (d,  $J$  = 8.5 Hz, 2 H), 6.87 (d,  $J$  = 8.5 Hz, 2 H), 4.66 (d,  $J$  = 11.3 Hz, 1 H), 4.54 (d,  $J$  = 11.3 Hz, 1 H), 4.49 (d,  $J$  = 11.5 Hz, 1 H), 4.46 (d,  $J$  = 11.5 Hz, 1 H), 3.85 (m, 1 H), 3.81 (s, 3 H), 3.80 (s, 3 H), 3.68 (dd,  $J$  = 6.1, 10.2 Hz, 1 H), 3.64 (m, 1 H), 3.59 (app dd,  $J$  = 4.1, 10.2 Hz, 2 H), 3.47 (dd,  $J$  = 5.8, 10.8 Hz, 1 H), 1.99 (m, 1 H), 0.88 (d,  $J$  = 7.1 Hz, 3 H);  $^{13}\text{C}$  NMR (125 MHz,  $\text{CDCl}_3$ )  $\delta$  159.25, 159.20, 130.20, 130.04, 129.48, 129.22, 113.80, 113.78, 79.59, 74.14, 73.07, 72.01, 70.40, 65.00, 55.23, 36.91, 12.08; high resolution mass spectrum (ES+)  $m/z$  413.1946  $[(\text{M}+\text{Na})^+]$ ; calcd for  $\text{C}_{22}\text{H}_{30}\text{O}_6\text{Na}$ : 413.2042].

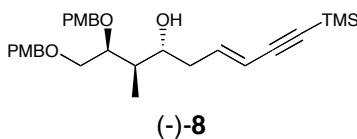

**Enyne (-)-8.** In flask A, a suspension of NaH (15.3 mg, 3.3 equiv., 95% wt.) in THF (2.1 mL) was cooled to 0 °C and treated with a solution of azeotroped diol (-)-**7** (79.3 mg, 1.1 equiv.) in THF (2.0 mL). After 1 h, a solution of trisylimidazole (61.5 mg, 18.4  $\mu\text{mole}$ ) in THF (1.0 mL) was added dropwise *via* syringe pump over 1 h 40 min. Concurrently, in flask B, MeLi (370  $\mu\text{L}$ , 2.5 equiv., 1.24 M in ether) was added dropwise to a solution of 1,4-bis(trimethylsilyl)-1,3-butadiyne (89.4 mg, 2.5 equiv.) in THF (1.8 mL). This slightly cloudy, pale yellow solution was kept stirring at ambient temperature for 2.5 h. Returning to

flask A, after an additional 30 min., the white slurry was cooled to  $-78\text{ }^{\circ}\text{C}$  and treated with the lithium anion in flask B *via* cannula followed by  $\text{BF}_3\cdot\text{OEt}_2$  (93  $\mu\text{L}$ , 4.0 equiv.). After 45 min., the slurry was quenched with MeOH (5 mL), and after 1 min. diluted with  $\text{NH}_4\text{Cl}_{(\text{aq})}$  (15 mL, 50% sat.) and 2:1 hexanes:EtOAc (15 mL). The aqueous phase was then washed with 2:1 hexanes:EtOAc (2 x 10 mL) and the combined organic layers were dried over  $\text{MgSO}_4$  and concentrated *in vacuo*. Purification by flash chromatography (3/1, hexanes/EtOAc) afforded 45.2 mg (50% yield) of the bis-acetylene compound as a pale yellow oil:  $R_f$  0.40 (3/1 hexanes/EtOAc);  $[\alpha]_D^{20}$   $-74.0$  ( $c$  1.82  $\text{C}_6\text{H}_6$ ); IR (thin film,  $\text{CH}_2\text{Cl}_2$ ) 3446 (m, br), 2957 (m), 2909 (m), 2836 (m), 2224 (m), 2107 (m), 1612 (m), 1513 (s), 1464 (m), 1302 (m), 1249 (s), 1173 (m), 1035 (m)  $\text{cm}^{-1}$ ;  $^1\text{H}$  NMR (500 MHz,  $\text{CDCl}_3$ )  $\delta$  7.26 (d,  $J$  = 8.6 Hz, 2 H), 7.24 (d,  $J$  = 8.6 Hz, 2 H), 6.89 (d,  $J$  = 8.6 Hz, 2 H), 6.86 (d,  $J$  = 8.6 Hz, 2 H), 4.67 (d,  $J$  = 11.2 Hz, 1 H), 4.54 (d,  $J$  = 11.2 Hz, 1 H), 4.49 (d,  $J$  = 11.5 Hz, 1 H), 4.46 (d,  $J$  = 11.5 Hz, 1 H), 3.94 (m, 1 H), 3.81 (s, 3 H), 3.80 (s, 3 H), 3.58 (app dd,  $J$  = 6.3, 10.2 Hz, 2 H), 3.56 (dd,  $J$  = 4.2, 10.2 Hz, 1 H), 3.35 (d,  $J$  = 5.6 Hz, 1 H), 2.50 (dd,  $J$  = 5.4, 17.4 Hz, 1 H), 2.44 (dd,  $J$  = 5.6, 17.4 Hz, 1 H), 2.01 (m, 1 H), 0.90 (d,  $J$  = 7.1 Hz, 3 H), 0.18 (s, 9 H);  $^{13}\text{C}$  NMR (125 MHz,  $\text{CDCl}_3$ )  $\delta$  159.24, 159.19, 130.19, 130.09, 129.59, 129.23, 113.78, 88.31, 83.49, 78.37, 76.46, 73.01, 72.52, 72.06, 71.10, 67.30, 55.21, 38.73, 26.17, 11.81,  $-0.40$ ; high resolution mass spectrum (ES+)  $m/z$  517.2372  $[(\text{M}+\text{Na})^+]$ ; calcd for  $\text{C}_{29}\text{H}_{38}\text{O}_5\text{SiNa}$ : 517.2489].

The  $\text{LiAlH}_4$  (9.0 mg, 2.5 equiv., 95%) was charged with a solution of the above azeotroped bis-alkyne (44.8 mg, 90.5  $\mu\text{mole}$ ) in ether (2.6 mL). Gas Evolution! The suspension was then warmed to  $35\text{ }^{\circ}\text{C}$ , and after 5 h, *carefully* quenched with 2:1  $\text{Na}_2\text{SO}_4\cdot 10\text{H}_2\text{O}$ :celite until stirring ceased. The suspension was then diluted with 1.5 mL  $\text{CH}_2\text{Cl}_2$ , and after 30 min., charged with  $\text{Na}_2\text{SO}_4$ , filtered, and concentrated *in vacuo*. Purification by flash chromatography (2/1, hexanes/EtOAc) afforded 38.5 mg (86% yield) of enyne (-)-**8** as a pale yellow oil:  $R_f$  0.64 (2/1 hexanes/EtOAc);  $[\alpha]_D^{20}$   $-14.5$  ( $c$  1.90  $\text{CH}_2\text{Cl}_2$ ); IR (thin film,  $\text{CDCl}_3$ ) 3473 (m, br), 2956 (s), 2906 (s), 2171 (w), 2132 (w), 1935, (w), 1612 (s), 1585 (m), 1514 (s), 1302 (s), 1248 (s), 1173 (m)  $\text{cm}^{-1}$ ;  $^1\text{H}$  NMR (500 MHz,  $\text{CDCl}_3$ )  $\delta$  7.26 (d,  $J$  = 8.6 Hz, 2 H), 7.24 (d,  $J$  = 8.6 Hz, 2 H), 6.89 (d,  $J$  = 8.6 Hz, 2 H), 6.86 (d,  $J$  = 8.6 Hz, 2 H), 6.25 (ddd,  $J$  = 7.3, 7.3, 15.9 Hz, 1 H), 5.54 (d,  $J$  = 15.9 Hz, 1 H), 4.66 (d,  $J$  = 11.3 Hz, 1 H), 4.53 (d,  $J$  = 11.3 Hz, 1 H), 4.48 (d,  $J$  = 11.6 Hz, 1 H), 4.45 (d,  $J$  = 11.6 Hz, 1 H), 3.90 (m, 1 H), 3.81 (s, 3 H), 3.80 (s, 3 H), 3.67 (dd,  $J$  = 6.3, 10.1 Hz, 1 H), 3.56 (m, 1 H),



3.54 (dd,  $J = 4.3, 10.1$  Hz, 1 H), 2.31 (m, 1 H), 2.17 (m, 1 H), 1.80 (m, 1 H), 0.88 (d,  $J = 7.1$  Hz, 3 H), 0.18 (s, 9 H);  $^{13}\text{C}$  NMR (125 MHz,  $\text{CDCl}_3$ )  $\delta$  159.25, 159.20, 142.27, 130.26, 130.14, 129.60, 129.23, 113.79, 111.97, 103.85, 93.06, 78.76, 73.42, 73.03, 71.98, 71.08, 55.24, 39.25, 38.92, 11.96, -0.06; high resolution mass spectrum (ES+)  $m/z$  519.2525  $[(\text{M}+\text{Na})^+]$ ; calcd for  $\text{C}_{29}\text{H}_{40}\text{O}_5\text{SiNa}$ : 519.2645].

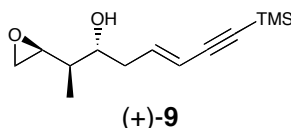

**Epoxide (+)-9.** A 0 °C solution of (-)-8 (26.9 mg, 54.1  $\mu\text{mole}$ ) in  $\text{CH}_3\text{CN}$  (1.4 mL) and pH 7.0 aq. buffer (140  $\mu\text{L}$ ) was charged with the ceric ammonium nitrate (408 mg, 6.0 equiv.) in three portions. The orange solution was then allowed to warm to ambient temperature, and after 45 min. was charged with  $\text{Na}_2\text{SO}_4$  and immediately purified by flash chromatography (100% EtOAc, prepared column with 1%  $\text{Et}_3\text{N}$ ) to afford 13.4 mg (97% yield) of the triol as a colorless oil:  $R_f$  0.33 (100% EtOAc);  $[\alpha]_D^{20} +20.5$  ( $c$  0.36,  $\text{C}_6\text{H}_6$ ); IR (thin film,  $\text{CDCl}_3$ ) 3356 (s, br), 2958 (s), 2898 (s), 2171 (w), 2133 (m), 1421 (m), 1249 (s), 1082 (m), 843 (s)  $\text{cm}^{-1}$ ;  $^1\text{H}$  NMR (500 MHz,  $\text{CDCl}_3$ )  $\delta$  6.21 (m, 1 H), 5.61 (d,  $J = 15.9$  Hz, 1 H), 3.98 (m, br, 1 H), 3.67 (m, br, 2 H), 3.61 (m, br, 1 H), 2.41 (m, 1 H), 2.29 (m, 1 H), 1.73 (m, 1 H), 0.94 (d,  $J = 7.0$  Hz, 3 H), 0.18 (s, 9 H);  $^{13}\text{C}$  NMR (125 MHz,  $\text{CDCl}_3$ )  $\delta$  141.03, 113.17, 103.27, 93.81, 74.21, 73.38, 64.44, 39.33, 39.20, 12.17, -0.15; high resolution mass spectrum (CI,  $\text{NH}_3$ )  $m/z$  257.1575  $[(\text{MH})^+]$ ; calcd for  $\text{C}_{13}\text{H}_{25}\text{O}_3\text{Si}$ : 257.1573].

A 0 °C solution of the above azeotrope triol (1.6 mg, 6.2  $\mu\text{mole}$ ) in THF (300  $\mu\text{L}$ ) was charged with the NaH (1.0 mg, 4.0 equiv., 60% wt.). After 1 h, a solution of the trisylimidazole (2.0 mg, 1.0 equiv.) in THF (200  $\mu\text{L}$ ) was added dropwise over 2 h 10 min. The white slurry was then diluted with  $\text{NH}_4\text{Cl}_{(\text{aq})}$  (10 mL, 50% sat.) and  $\text{CH}_2\text{Cl}_2$  (10 mL). The aqueous phase was then washed with  $\text{CH}_2\text{Cl}_2$  (3 x 3 mL) and the combined organic layers were dried over  $\text{Na}_2\text{SO}_4$  and concentrated *in vacuo*. Purification by Prep-TLC (2/1, hexanes/EtOAc, 500  $\mu\text{m}$  plate) afforded 0.9 mg (61% yield) of epoxide (+)-9 as a pale yellow oil:  $R_f$  0.26 (2/1 hexanes/EtOAc);  $[\alpha]_D^{20} +31.8$  ( $c$  0.66  $\text{C}_6\text{H}_6$ ); IR (thin film,  $\text{CDCl}_3$ ) 3445 (s, br), 2962 (s), 2899 (m), 2172 (w), 2134 (m), 1409 (w), 1249 (s), 1082 (s), 957 (m), 843 (s)  $\text{cm}^{-1}$ ;  $^1\text{H}$  NMR (500 MHz,  $\text{C}_6\text{D}_6$ )  $\delta$  6.20 (ddd  $J = 7.4, 7.4, 15.9$  Hz, 1 H), 5.52 (ddd,  $J = 1.4, 1.4, 15.9$  Hz, 1 H), 3.05 (ddd,  $J = 4.1, 8.0,$

11.9 Hz, 1 H), 2.58 (ddd,  $J$  = 2.8, 3.8, 6.5 Hz, 1 H), 2.29 (dd,  $J$  = 3.8, 4.9 Hz, 1 H), 2.17 (dd,  $J$  = 2.7, 4.9 Hz, 1 H), 1.92 (dddd,  $J$  = 1.5, 3.9, 7.0, 14.4 Hz, 1 H), 1.84 (m, 1 H), 1.40 (d,  $J$  = 4.3 Hz, 1 H), 1.13 (m, 1 H), 0.70 (d,  $J$  = 6.9 Hz, 3 H), 0.21 (s, 9 H);  $^{13}\text{C}$  NMR (125 MHz,  $\text{C}_6\text{D}_6$ )  $\delta$  142.18, 112.91, 104.60, 93.56, 72.92, 53.91, 46.06, 40.57, 38.61, 12.97, 0.04; high resolution mass spectrum (CI,  $\text{NH}_3$ )  $m/z$  239.1461 [(MH) $^+$ ]; calcd for  $\text{C}_{13}\text{H}_{22}\text{O}_2\text{Si}$ : 239.1466].

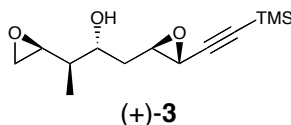

**Epoxide (+)-3.** All glassware was placed in a saturated KOH/*i*-PrOH mixture overnight prior to use and teflon tubing was used as the needle for the  $\text{K}_2\text{CO}_3$  and oxone solutions. A solution of (+)-9 (62.9 mg, 264  $\mu\text{mole}$ ), and (-)-10 (34.0 mg, 0.5 equiv.) in HPLC grade  $\text{CH}_3\text{CN}$  (4.0 mL) and buffer [2.6 mL, 0.05 M  $\text{Na}_2\text{B}_4\text{O}_7 \cdot 10\text{H}_2\text{O}$  in  $4 \times 10^{-4}$  M aq.  $\text{Na}_2(\text{EDTA})$ ] was charged with the  $\text{Bu}_4\text{NHSO}_4$  (3.6 mg, 0.04 equiv.). After 2-3 min., the suspension was sequentially treated with a drop of the solution of  $\text{K}_2\text{CO}_3$  (317 mg, 8.7 equiv.) in water (1.7 mL) followed by a drop of the solution of oxone (336 mg, 2.07 equiv.) in aqueous  $\text{Na}_2\text{EDTA}$  (1.7 mL,  $4 \times 10^{-4}$  M). This process was uniformly repeated making the total addition time 1.5 h. The white suspension was then diluted with  $\text{CH}_2\text{Cl}_2$  (15 mL) and water (15 mL), and the aqueous phase was washed with  $\text{CH}_2\text{Cl}_2$  ( $3 \times 10$  mL). The combined organic layers were then washed with brine (15 mL), dried over  $\text{MgSO}_4$  and concentrated *in vacuo*. Purification *via* Semi-Prep HPLC (Waters Nova-Pak silica 6  $\mu\text{m}$ , 19 x 300 mm column, flow rate 10 mL/min., 2% IPA in hexanes) afforded 14.6 mg ( $R_f \sim 28$  min., 23% yield) of recovered (+)-9 and 27.2 mg ( $R_f \sim 32$  min., 41% yield) of bis-epoxide (+)-3 as a colorless oil:  $R_f$  0.21 (2/1 hexanes/EtOAc with 1%  $\text{Et}_3\text{N}$ );  $[\alpha]_D^{20} +46.4$  ( $c$  0.95,  $\text{C}_6\text{H}_6$ ); IR (thin film,  $\text{CDCl}_3$ ) 3465 (m, br), 2963 (m), 2180 (w), 1250 (s), 844 (s)  $\text{cm}^{-1}$ ;  $^1\text{H}$  NMR (500 MHz,  $\text{C}_6\text{D}_6$ )  $\delta$  3.27 (m, 2 H), 3.02 (d,  $J$  = 2.2 Hz, 1 H), 2.57 (ddd,  $J$  = 2.8, 3.9, 6.6 Hz, 1 H), 2.29 (dd,  $J$  = 4.0, 4.9 Hz, 1 H), 2.19 (dd,  $J$  = 2.7, 4.9 Hz, 1 H), 1.90 (d,  $J$  = 4.4 Hz, 1 H), 1.40 (ddd,  $J$  = 4.2, 10.0, 14.2 Hz, 1 H), 1.13 (m, 2 H), 0.68 (d,  $J$  = 6.9 Hz, 3 H), 0.13 (s, 9 H);  $^{13}\text{C}$  NMR (125 MHz,  $\text{C}_6\text{D}_6$ )  $\delta$  103.19, 89.20, 70.97, 58.44, 53.81, 45.91, 45.84, 41.25, 36.71, 12.78, -0.30; high resolution mass spectrum (ES $^+$ )  $m/z$  277.1224 [(M+Na) $^+$ ]; calcd for  $\text{C}_{13}\text{H}_{22}\text{O}_3\text{SiNa}$ : 277.1234].

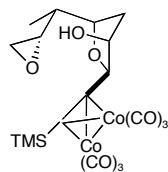

**(+)-11**

**Epoxide (+)-11.** The  $\text{Co}_2(\text{CO})_8$  (27.7 mg, 1.5 equiv., weighed out using a glove bag) was rapidly treated with a solution of azeotroped (+)-3 (13.9 mg, 54.6  $\mu\text{mole}$ ) in  $\text{CH}_2\text{Cl}_2$  (1.6 mL). Gas evolution! After 50 min., the dark brown solution was cooled to  $-78^\circ\text{C}$ , stirred an additional 30 min., and treated with 50  $\mu\text{L}$  (0.69  $\mu\text{L}$ , 0.1 equiv.) of a solution of  $\text{BF}_3\cdot\text{OEt}_2$  (82  $\mu\text{L}$ ) in  $\text{CH}_2\text{Cl}_2$  (6.0 mL). After 15 min., the reaction was quenched with water (2 mL), warmed to ambient temperature and the aqueous phase was washed with  $\text{CH}_2\text{Cl}_2$  (2 x 1.5 mL). The combined organic layers were then dried over  $\text{MgSO}_4$  and concentrated *in vacuo*. Purification by Preparative-TLC (3/1, hexanes/EtOAc, 500  $\mu\text{m}$  plate) afforded 23.0 mg (78% yield) of (+)-11 as a brown oil:  $R_f$  0.23 (5/1, hexanes/EtOAc);  $[\alpha]_D^{20} +45.0$  ( $c$  0.71,  $\text{C}_6\text{H}_6$ ); IR (thin film,  $\text{CDCl}_3$ ) 3446 (w), 2963 (w), 2086 (s), 2046 (s), 2016 (s), 1559 (w), 1456 (w), 1247 (w), 1047 (w), 839 (m)  $\text{cm}^{-1}$ ;  $^1\text{H}$  NMR (500 MHz,  $\text{CDCl}_3$ )  $\delta$  4.79 (d,  $J$ = 3.8 Hz, 1 H), 4.35 (m, 1 H), 3.87 (ddd,  $J$ = 8.0, 8.0, 8.0 Hz, 1 H), 2.92 (m, 1 H), 2.74 (dd,  $J$ = 4.2, 4.6 Hz, 1 H), 2.63 (dd,  $J$ = 2.7, 4.7 Hz, 1 H), 2.52 (m, 1 H), 1.77 (ddd,  $J$ = 2.2, 7.4, 13.7 Hz, 1 H), 1.59 (d,  $J$ = 6.7 Hz, 1 H), 1.57 (m, 1 H), 1.03 (d,  $J$ = 6.8 Hz, 3 H), 0.31 (s, 9 H);  $^{13}\text{C}$  NMR (125 MHz,  $\text{CDCl}_3$ )  $\delta$  200.17, 128.33, 102.15, 84.62, 79.90, 73.31, 54.68, 47.53, 41.77, 40.76, 13.02, 0.84; high resolution mass spectrum (FAB)  $m/z$  427.9899  $[(\text{M}-4\text{CO})^+]$ ; calcd for  $\text{C}_{15}\text{H}_{22}\text{Co}_2\text{O}_5\text{Si}$ : 427.9697]. Vapor diffusion crystallization (EtAc/heptane) afforded crystals suitable for X-ray analysis: mp  $70-71^\circ\text{C}$ .

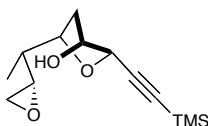

**(-)-15**

**Epoxide (-)-15.** A solution of azeotroped (+)-3 (22.7 mg, 89.2  $\mu\text{mole}$ ) in  $\text{CH}_2\text{Cl}_2$  (2.3 mL) was treated with 156  $\mu\text{L}$  (38.6 mg, 1.26 equiv.) of a solution of  $\text{Co}_2\text{CO}_8$  (175 mg, weighed out using a glove bag) in  $\text{CH}_2\text{Cl}_2$  (710  $\mu\text{L}$ ). After 1 h, the brown solution was cooled to  $-78^\circ\text{C}$ , and treated with 50  $\mu\text{L}$  (1.3  $\mu\text{L}$ , 0.11 equiv.) of a solution of  $\text{BF}_3\cdot\text{OEt}_2$  (128  $\mu\text{L}$ ) in  $\text{CH}_2\text{Cl}_2$  (5.0 mL). After 10 min., the CAN (309 mg, 6.3 equiv.) in

MeOH (1.6 mL) was added to produce a much lighter color solution. After an additional 10 min., water (5 mL) was added, the reaction was warmed to ambient temperature and diluted with water (5 mL) and CH<sub>2</sub>Cl<sub>2</sub> (10 mL). The aqueous phase was then washed with CH<sub>2</sub>Cl<sub>2</sub> (4 x 10 mL) and the combined organic layers were dried over MgSO<sub>4</sub> and concentrated *in vacuo*. Purification by flash chromatography (2/1, hexanes/EtOAc) afforded 19.9 mg (88% yield) of epoxide (-)-**15** as a pale orange oil: R<sub>f</sub> 0.23 (2/1 hexanes/EtOAc);  $[\alpha]_D^{20}$  -47.3 (*c* 0.55 C<sub>6</sub>H<sub>6</sub>); IR (thin film, CDCl<sub>3</sub>) 3457 (w, br), 3053 (w), 2962 (s), 2928 (w), 2168 (w), 1326 (w), 1251 (s), 1086 (s), 1045 (s), 844 (s) cm<sup>-1</sup>; <sup>1</sup>H NMR (500 MHz, CDCl<sub>3</sub>)  $\delta$  4.47 (d, *J* = 4.9 Hz, 1 H), 4.30 (dddd, *J* = 4.9, 4.9, 4.9, 6.4 Hz, 1 H), 3.81 (ddd, *J* = 7.7, 7.7, 7.7 Hz, 1 H), 2.89 (ddd, *J* = 2.7, 3.9, 6.8 Hz, 1 H), 2.82 (dd, *J* = 4.0, 4.9 Hz, 1 H), 2.67 (dd, *J* = 2.7, 4.9 Hz, 1 H), 2.31 (m, 1 H), 2.10 (d, *J* = 5.2 Hz, 1 H), 1.78 (ddd, *J* = 4.5, 7.7, 13.0 Hz, 1 H), 1.66 (m, 1 H), 0.98 (d, *J* = 6.9 Hz, 3 H), 0.20 (s, 9 H); <sup>13</sup>C NMR (125 MHz, CDCl<sub>3</sub>)  $\delta$  100.11, 94.71, 80.79, 74.01, 72.13, 54.54, 47.47, 41.59, 37.76, 12.73, -0.22; high resolution mass spectrum (CI, NH<sub>3</sub>) *m/z* 254.1326 [M<sup>+</sup>; calcd for C<sub>13</sub>H<sub>22</sub>O<sub>3</sub>Si: 254.1337].

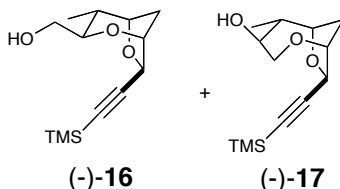

**Bicycles (-)-16 and (-)-17.** Representative procedure from entry 3 in Table 1. A 0 °C solution of azeotroped (-)-**15** (5.7 mg, 22.4  $\mu$ mole) in CH<sub>2</sub>Cl<sub>2</sub> (1.4 mL) was treated with 50  $\mu$ L (0.3  $\mu$ L, 0.1 equiv.) of a solution of BF<sub>3</sub>•OEt<sub>2</sub> (84  $\mu$ L) in CH<sub>2</sub>Cl<sub>2</sub> (15.0 mL). After 1 h, the reaction was immediately passed through a plug of silica and concentrated *in vacuo* to afford a 1:1 ratio of bicycles. Purification *via* Semi-Prep HPLC (Waters Nova-Pak silica 6  $\mu$ m, 19 x 300 mm column, flow rate 10 mL/min., 13% IPA in hexanes) afforded 2.7 mg (R<sub>f</sub>~ 14 min., 47% yield) of bicycle (-)-**16** and 2.8 mg (R<sub>f</sub>~ 17 min., 49% yield) of bicycle (-)-**17** as colorless oils. For bicycle (-)-**16**: R<sub>f</sub> 0.26 (8/1 CH<sub>2</sub>Cl<sub>2</sub>/EtOAc);  $[\alpha]_D^{20}$  -80.0 (*c* 0.13, C<sub>6</sub>H<sub>6</sub>); IR (thin film, C<sub>6</sub>D<sub>6</sub>) 3445 (m, br), 2960 (s), 2181 (w), 1457 (m), 1250 (m), 1076 (s), 842 (s) cm<sup>-1</sup>; <sup>1</sup>H NMR (500 MHz, C<sub>6</sub>D<sub>6</sub>)  $\delta$  4.37 (d, *J* = 2.7 Hz, 1 H), 4.33 (ddd, *J* = 2.7, 5.0, 9.7 Hz, 1 H), 3.96 (m, 1 H), 3.81 (app dd, *J* = 6.2, 6.2 Hz, 1 H), 3.75 (ddd, *J* = 2.5, 6.2, 11.6 Hz, 1 H), 3.44 (ddd, *J* = 5.2, 6.4, 11.6 Hz, 1 H), 1.87 (dd, *J* = 6.5, 6.5 Hz, 1 H), 1.24 (m, 2 H), 1.18 (m, 1 H), 0.76 (d, *J* = 6.7 Hz, 3 H), 0.17 (s, 9 H); <sup>13</sup>C NMR (125 MHz,

C<sub>6</sub>D<sub>6</sub>)  $\delta$  101.94, 92.61, 80.20, 78.27, 76.55, 71.76, 63.61, 38.31, 36.36, 15.32, -0.20; high resolution mass spectrum (ES+)  $m/z$  277.1229 [(M+Na)<sup>+</sup>; calcd for C<sub>13</sub>H<sub>22</sub>O<sub>3</sub>SiNa: 277.1337]. For bicycle (-)-**17**: R<sub>f</sub> 0.16 (8/1 CH<sub>2</sub>Cl<sub>2</sub>/EtOAc);  $[\alpha]_D^{20}$  -83.2 (*c* 0.13, C<sub>6</sub>H<sub>6</sub>); IR (thin film, C<sub>6</sub>D<sub>6</sub>) 3407 (m, br), 2958 (s), 2183 (w), 1457 (w), 1249 (m), 1077 (s), 842 (s) cm<sup>-1</sup>; <sup>1</sup>H NMR (500 MHz, C<sub>6</sub>D<sub>6</sub>)  $\delta$  4.31 (d, *J* = 3.2 Hz, 1 H), 3.97 (dd, *J* = 3.8, 3.8 Hz, 1 H), 3.93 (dd, *J* = 2.1, 12.6 Hz, 1 H), 3.78 (app dd, *J* = 1.7, 9.1 Hz, 1 H), 3.57 (m, 1 H), 3.36 (dd, *J* = 9.0, 12.6 Hz, 1 H), 1.77 (app d, *J* = 14.0 Hz, 1 H), 1.20 (ddd, *J* = 4.5, 9.1, 14.0 Hz, 1 H), 1.11 (d, *J* = 6.8 Hz, 3 H), 1.02 (m, 1 H), 0.85 (d, *J* = 6.1 Hz, 1 H), 0.18 (s, 9 H); <sup>13</sup>C NMR (125 MHz, C<sub>6</sub>D<sub>6</sub>)  $\delta$  102.37, 92.29, 81.34, 77.11, 75.62, 73.77, 68.65, 45.06, 32.96, 16.44, -0.01; high resolution mass spectrum (ES+)  $m/z$  277.1239 [(M+Na)<sup>+</sup>; calcd for C<sub>13</sub>H<sub>22</sub>O<sub>3</sub>SiNa: 277.1337].

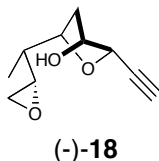

**Epoxide (-)-18.** A solution of azeotroped (-)-**15** (14.3 mg, 56.2  $\mu$ mole) in THF (1.2 mL) was charged with tetrabutylammonium fluoride (62  $\mu$ L, 1.1 equiv., 1 M in THF). After 1 h, the reaction was concentrated *in vacuo* and purified by flash chromatography (1/1, hexanes/EtOAc) to afford 9.6 mg (94% yield) of epoxide (-)-**18** as a colorless oil: R<sub>f</sub> 0.27 (1/1 hexanes/EtOAc);  $[\alpha]_D^{20}$  -43.7 (*c* 0.40 C<sub>6</sub>H<sub>6</sub>); IR (thin film, C<sub>6</sub>D<sub>6</sub>) 3418 (m), 3267 (m), 3054 (w), 2971 (m), 2928 (m), 2111 (w), 1457 (w), 1327 (w), 1261 (w), 1101 (m), 1042 (s) cm<sup>-1</sup>; <sup>1</sup>H NMR (500 MHz, C<sub>6</sub>D<sub>6</sub>)  $\delta$  4.05 (dd, *J* = 2.1, 4.9 Hz, 1 H), 3.77 (m, 1 H), 3.33 (m, 1 H), 2.78 (ddd, *J* = 2.6, 3.9, 6.6 Hz, 1 H), 2.51 (dd, *J* = 3.9, 5.1 Hz, 1 H), 2.44 (dd, *J* = 2.6, 5.1 Hz, 1 H), 1.96 (d, *J* = 2.1 Hz, 1 H), 1.75 (d, *J* = 5.5 Hz, 1 H), 1.65 (m, 1 H), 1.49 (m, 2 H), 0.79 (d, *J* = 6.8 Hz, 3 H); <sup>13</sup>C NMR (125 MHz, C<sub>6</sub>D<sub>6</sub>)  $\delta$  80.61, 79.69, 76.62, 73.32, 72.47, 54.14, 46.91, 41.77, 37.93, 12.67; high resolution mass spectrum (CI, NH<sub>3</sub>)  $m/z$  182.0942 [M<sup>+</sup>; calcd for C<sub>10</sub>H<sub>14</sub>O<sub>3</sub>: 182.0942].

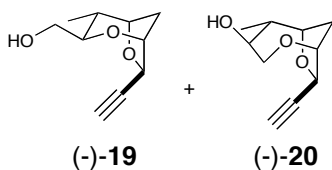

**Bicycles (-)-19 and (-)-20.** Representative procedure from entry 2 in Table 2. To a 40 °C solution of  $\text{BF}_3 \cdot \text{OEt}_2$  (74  $\mu\text{L}$ , 10.0 equiv.) in  $\text{CH}_2\text{Cl}_2$  (2.5 mL) was added a solution of azeotroped (-)-**18** (10.7 mg, 58.7  $\mu\text{mole}$ ) in  $\text{CH}_2\text{Cl}_2$  (1.4 mL) dropwise over 5 min.. The solution was then quenched with water (1.5 mL), cooled to ambient temperature, and diluted with  $\text{CH}_2\text{Cl}_2$  (10 mL). The aqueous phase was then washed with  $\text{CH}_2\text{Cl}_2$  (3 x 5 mL), and the combined organic layers were washed with brine (5 mL), dried over  $\text{MgSO}_4$  and concentrated *in vacuo* to afford a 2.1:1 ratio of bicycles. Purification by flash chromatography (3/1,  $\text{CH}_2\text{Cl}_2/\text{Et}_2\text{O}$ ) afforded 7.2 mg (65% yield) of bicycle (-)-**19** and 3.5 mg (32% yield) of bicycle (-)-**20** as colorless oils. For bicycle (-)-**19**:  $R_f$  0.25 (3/1  $\text{CH}_2\text{Cl}_2/\text{OEt}_2$ );  $[\alpha]_D^{20}$  -120.0 (*c* 0.25  $\text{C}_6\text{H}_6$ ); IR (thin film,  $\text{C}_6\text{D}_6$ ) 3432 (m, br), 3279 (m, br), 2959 (m), 2198 (s), 2876 (m), 2849 (m), 2119 (w), 1718 (w), 1457 (m), 1149 (m), 1045 (s)  $\text{cm}^{-1}$ ;  $^1\text{H}$  NMR (500 MHz,  $\text{C}_6\text{D}_6$ )  $\delta$  4.26 (dd,  $J$ = 2.5, 2.5 Hz, 1 H), 4.17 (ddd,  $J$ = 2.6, 4.4, 9.6 Hz, 1 H), 3.90 (m, 1 H), 3.80 (app d,  $J$ = 6.2 Hz, 1 H), 3.68 (ddd,  $J$ = 2.6, 5.4, 11.6 Hz, 1 H), 3.38 (ddd,  $J$ = 4.4, 7.2, 11.6 Hz, 1 H), 2.15 (d,  $J$ = 2.4 Hz, 1 H), 1.72 (dd,  $J$ = 5.4, 7.2 Hz, 1 H), 1.31 (m, 1 H), 1.24 (app dd,  $J$ = 1.4, 11.6 Hz, 1 H), 1.19 (ddd,  $J$ = 2.7, 6.2, 11.6 Hz, 1 H), 0.74 (d,  $J$ = 6.7 Hz, 3 H);  $^{13}\text{C}$  NMR (125 MHz,  $\text{C}_6\text{D}_6$ )  $\delta$  80.16, 79.53, 78.07, 76.38, 75.85, 71.10, 63.28, 38.14, 36.14, 15.28; high resolution mass spectrum (CI,  $\text{NH}_3$ )  $m/z$  183.1018 [(MH) $^+$ ; calcd for  $\text{C}_{10}\text{H}_{15}\text{O}_3$ : 183.1020]. Vapor diffusion crystallization (EtAc/heptane) afforded crystals suitable for X-ray analysis: mp 71-73 °C. For bicycle (-)-**20**:  $R_f$  0.15 (3/1  $\text{CH}_2\text{Cl}_2/\text{Et}_2\text{O}$ );  $[\alpha]_D^{20}$  -33.0 (*c* 0.06,  $\text{C}_6\text{H}_6$ ); IR (thin film,  $\text{C}_6\text{D}_6$ ) 3401 (s, br), 3229 (s), 2917 (s), 2121 (w), 1462 (m), 1230 (m), 1158 (m), 1049 (s), 1028 (m)  $\text{cm}^{-1}$ ;  $^1\text{H}$  NMR (500 MHz,  $\text{C}_6\text{D}_6$ )  $\delta$  4.19 (dd,  $J$ = 2.3, 3.0 Hz, 1 H), 3.91 (m, 1 H), 3.83 (dd,  $J$ = 2.2, 12.6 Hz, 1 H), 3.77 (app dd,  $J$ = 1.7, 9.0 Hz, 1 H), 3.50 (m, 1 H), 3.34 (dd,  $J$ = 9.2, 12.6 Hz, 1 H), 2.21 (d,  $J$ = 2.3 Hz, 1 H), 1.76 (app d,  $J$ = 14.0 Hz, 1 H), 1.22 (ddd,  $J$ = 4.6, 9.0, 14.0 Hz, 1 H), 1.12 (d,  $J$ = 6.8 Hz, 3 H), 1.00 (m, 1 H), 0.83 (d,  $J$ = 5.1 Hz, 1 H);  $^{13}\text{C}$  NMR (125 MHz,  $\text{C}_6\text{D}_6$ )  $\delta$  81.45, 80.00, 76.98, 75.88, 75.08, 73.56, 68.86, 44.98, 32.67, 16.39; high resolution mass spectrum (CI,  $\text{NH}_3$ )  $m/z$  182.0948 [ $\text{M}^+$ ; calcd for  $\text{C}_{10}\text{H}_{14}\text{O}_3$ : 182.0942].

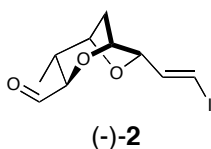

**Aldehyde (-)-2.** A solution of azeotroped (-)-**19** (1.8 mg, 9.8  $\mu$ mole) and a catalytic amount of AIBN in distilled Bu<sub>3</sub>SnH (75  $\mu$ L) was heated to 100 °C. After 2.5 h, the colorless solution was cooled to ambient temperature, charged with CH<sub>2</sub>Cl<sub>2</sub> (300  $\mu$ L) and treated with a solution of iodine in CH<sub>2</sub>Cl<sub>2</sub> until the dark brown/purple color persisted. After an additional 5 min., the reaction was diluted with CH<sub>2</sub>Cl<sub>2</sub> (10 mL) and Na<sub>2</sub>S<sub>2</sub>O<sub>5(aq)</sub> (5 mL, sat.). The aqueous phase was then washed with CH<sub>2</sub>Cl<sub>2</sub> (3 x 5 mL), and the combined organic layers were washed with brine (5 mL), dried over MgSO<sub>4</sub> and concentrated *in vacuo*. The residue was then dissolved in Et<sub>2</sub>O (5 mL) and charged with KF/celite<sup>3</sup> (195 mg). After 2 h, the suspension was filtered through a pad of celite, concentrated *in vacuo* and purified by flash chromatography (3/2, hexanes/EtOAc) to afford 2.3 mg (77% yield) of the *E*-vinyl iodide: R<sub>f</sub> 0.17 (3/2 hexanes/EtOAc);  $[\alpha]_D^{20}$  -30.7 (*c* 0.07 CH<sub>2</sub>Cl<sub>2</sub>); IR (thin film, CDCl<sub>3</sub>) 3418 (m, br), 2921 (s), 2863 (m), 1724 (w), 1600 (m), 1456 (m), 1074 (s), 1050 (s) cm<sup>-1</sup>; <sup>1</sup>H NMR (500 MHz, CDCl<sub>3</sub>)  $\delta$  6.81 (dd, *J*= 5.2, 14.5 Hz, 1 H), 6.56 (dd, *J*= 1.7, 14.5 Hz, 1 H), 4.38 (m, 1 H), 4.32 (m, 1 H), 4.27 (app d, *J*= 6.6 Hz, 1 H), 3.70 (ddd, *J*= 2.5, 5.2, 11.7 Hz, 1 H), 3.63 (ddd, *J*= 2.5, 4.3, 9.6 Hz, 1 H), 3.49 (ddd, *J*= 4.3, 7.5, 11.7 Hz, 1 H), 2.00 (ddd, *J*= 2.8, 6.6, 11.7 Hz, 1 H), 1.89 (dd, *J*= 5.2, 7.5 Hz, 1 H), 1.83 (app dd, *J*= 1.5, 11.7 Hz, 1 H), 1.67 (m, 1 H), 0.93 (d, *J*= 6.7 Hz, 3 H); <sup>13</sup>C NMR (125 MHz, CDCl<sub>3</sub>)  $\delta$  141.01, 83.56, 79.74, 79.39, 77.85, 75.76, 63.41, 38.35, 36.25, 15.52; high resolution mass spectrum (CI, NH<sub>3</sub>) *m/z* 310.0052 [M<sup>+</sup>; calcd for C<sub>10</sub>H<sub>15</sub>IO<sub>3</sub>: 310.0065].

A 0 °C solution of the above azeotroped vinyl iodide (1.3 mg, 4.1  $\mu$ mole) and pyridine (5  $\mu$ L, 12.5 equiv.) in CH<sub>2</sub>Cl<sub>2</sub> (250  $\mu$ L) was charged with the Dess-Martin periodinane (2.6 mg, 1.5 equiv.). The reaction was then allowed to warm to ambient temperature, and after 1 h, the white suspension was diluted with CH<sub>2</sub>Cl<sub>2</sub> (10 mL) and NaHCO<sub>3(aq)</sub> (5 mL, sat.). The aqueous phase was then washed with CH<sub>2</sub>Cl<sub>2</sub> (2 x 5 mL) and the combined organic layers were washed with brine (5 mL), dried over Na<sub>2</sub>SO<sub>4</sub> and concentrated *in vacuo*. Purification by flash chromatography (3/1, hexanes/EtOAc with 1% Et<sub>3</sub>N) afforded 1.3 mg (100% yield) of aldehyde (-)-**2**: R<sub>f</sub> 0.19 (3/1 hexanes/EtOAc);  $[\alpha]_D^{20}$  -20.0 (*c* 0.05 CHCl<sub>3</sub>); IR (thin film, CH<sub>2</sub>Cl<sub>2</sub>) 2917 (s), 2849 (s), 1738 (m), 1462 (w), 1261 (w), 1075 (m), 1044 (m) cm<sup>-1</sup>; <sup>1</sup>H NMR (500 MHz, C<sub>6</sub>D<sub>6</sub>)  $\delta$  9.34 (d, *J*= 1.4 Hz, 1 H), 6.60 (dd, *J*= 4.8, 14.5 Hz, 1 H), 6.38 (dd, *J*= 1.8, 14.5 Hz, 1 H), 3.75 (dd, *J*= 1.4, 10.3 Hz, 1 H), 3.73 (m, 1 H), 3.68 (m, 2 H), 1.21 (ddd, *J*= 2.7, 6.5, 11.8 Hz, 1 H), 1.13 (app dd, *J*= 1.4, 11.8 Hz, 1 H), 1.06 (m, 1 H), 0.82 (d, *J*= 6.7 Hz, 3 H); <sup>13</sup>C NMR (125 MHz, CDCl<sub>3</sub>)  $\delta$

190.54, 140.51, 83.34, 81.18, 79.31, 78.24, 75.53, 37.99, 36.86, 14.82; high resolution mass spectrum (Cl, NH<sub>3</sub>) m/z 308.9993 [(MH)<sup>+</sup>; calcd for C<sub>10</sub>H<sub>14</sub>IO<sub>3</sub>: 308.9987].

---

<sup>1</sup> Burchat, A. F.; Chong, J. M.; Nielsen, N. *J. Organometallic Chem.* **1997**, *542*, 281.

<sup>2</sup> Wang, Z. -X.; Tu, Y.; Frohn, M.; Zhang, J. -R.; Shi, Y. *J. Am. Chem. Soc.* **1997**, *119*, 11224.

<sup>3</sup> (a) Savall, B. M.; Powell, N. A.; Roush, W. R. *Org. Lett.* **2001**, *3*, 3057. (b) Ando, T.; Yamawaki, J. *Chem. Lett.* **1979**, 45.
